# Supplementary material
Source: publisher figshare collection journal article supplement (https://diabetesjournals.figshare.com/articles/dataset/_/19799398)
Supplement: Supplementary file 2 [file 1]

## Supplementary TABLE 1

### Baseline Characteristics

|                        | Control     | Hormone     |
|------------------------|-------------|-------------|
| N                      | 7           | 9           |
| Sex, male/female       | 3/4         | 4/5         |
| Age, years             | 27.6 ± 1.0  | 27.4 ± 1.2  |
| Height, cm             | 173.7 ± 3.6 | 169.5 ± 4.3 |
| Weight, kg             | 73.6 ± 3.8  | 70.6 ± 4.8  |
| BMI, kg/m <sup>2</sup> | 24.3 ± 0.9  | 24.4 ± 0.9  |
| Body fat %             | 32.1 ± 2.9  | 30.6 ± 2.2  |

Body composition was measured using dual energy X-ray absorptiometry. Data are means ± SEM. BMI, body mass index.
